# Supplementary material for: Slow magnetization relaxation in a tetrahedrally coordinated mononuclear Co(ii) complex exclusively ligated with phenanthroline ligands
Source: Royal Society of Chemistry journal article supplement (doi:10.1039/d0dt03481a), 2020-01-01
Supplement: d0dt03481a1.pdf [file d0dt03481a1.pdf]

# **Slow Magnetization Relaxation in A Tetrahedrally Coordinated Mononuclear Co(II) Complex Exclusively Ligated with Phenanthroline Ligands**

*Chen-Ming Wu,<sup>a</sup> Jae-En Tsai,<sup>a</sup> Gene-Hsiang Lee,<sup>b</sup> En-Che Yang<sup>\*a</sup>*

<sup>a</sup> Department of Chemistry, Fu-Jen Catholic University, Hsinchuang, New Taipei City, 24205, Taiwan, Republic of China

<sup>b</sup> Instrumentation Centre, College of Science, National Taiwan University, Taipei, 10672, Taiwan, Republic of China

\*E.-C. Yang, E-mail: [071549@mail.fju.edu.tw](mailto:071549@mail.fju.edu.tw) Phone: +886-2-2905-3571

**Table 1S** L-Co-L plane angle and D vaule comparison of other literat

| complex                                                                                                                                                                            | L-Co-L  | D (cm <sup>-1</sup> ) |
|------------------------------------------------------------------------------------------------------------------------------------------------------------------------------------|---------|-----------------------|
| [CoL <sub>2</sub> ](ClO <sub>4</sub> ) <sub>2</sub> <sup>a</sup>                                                                                                                   | 62.024° | -47.0                 |
| [Co(dmbpy) <sub>2</sub> ](ClO <sub>4</sub> ) <sub>2</sub> <sup>17(b)</sup>                                                                                                         | 88.7°   | -57.0                 |
| [Co{(NtBu) <sub>3</sub> SMe} <sub>2</sub> ] <sup>23</sup>                                                                                                                          | 88.700° | -58                   |
| [Co(pdms) <sub>2</sub> ](HNEt <sub>3</sub> ) <sub>2</sub> <sup>27</sup>                                                                                                            | 84.825° | -115                  |
| (HNEt <sub>3</sub> ) <sub>2</sub> [Co(L <sub>1</sub> ) <sub>2</sub> ]·H <sub>2</sub> O (H <sub>2</sub> L <sub>1</sub> =<br>N,N'-bis(p-toluene-sulfonyl)<br>oxamide <sup>33</sup> ) | 87.308° | -144.31               |
| (Bu <sub>4</sub> N) <sub>2</sub> [Co(L <sub>2</sub> ) <sub>2</sub> ]·H <sub>2</sub> O (H <sub>2</sub> L <sub>2</sub> =<br>N,N'-diphenyloxamide <sup>33</sup> )                     | 85.726° | -130.8                |

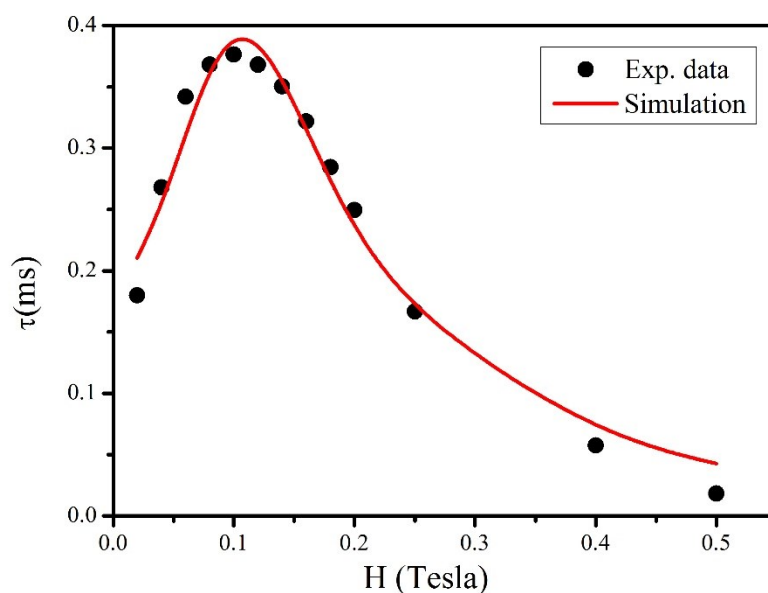**Figure 1S** Field dependent magnetic relaxation times at 2K, variable-field observe QTM was shut down above 1000G.

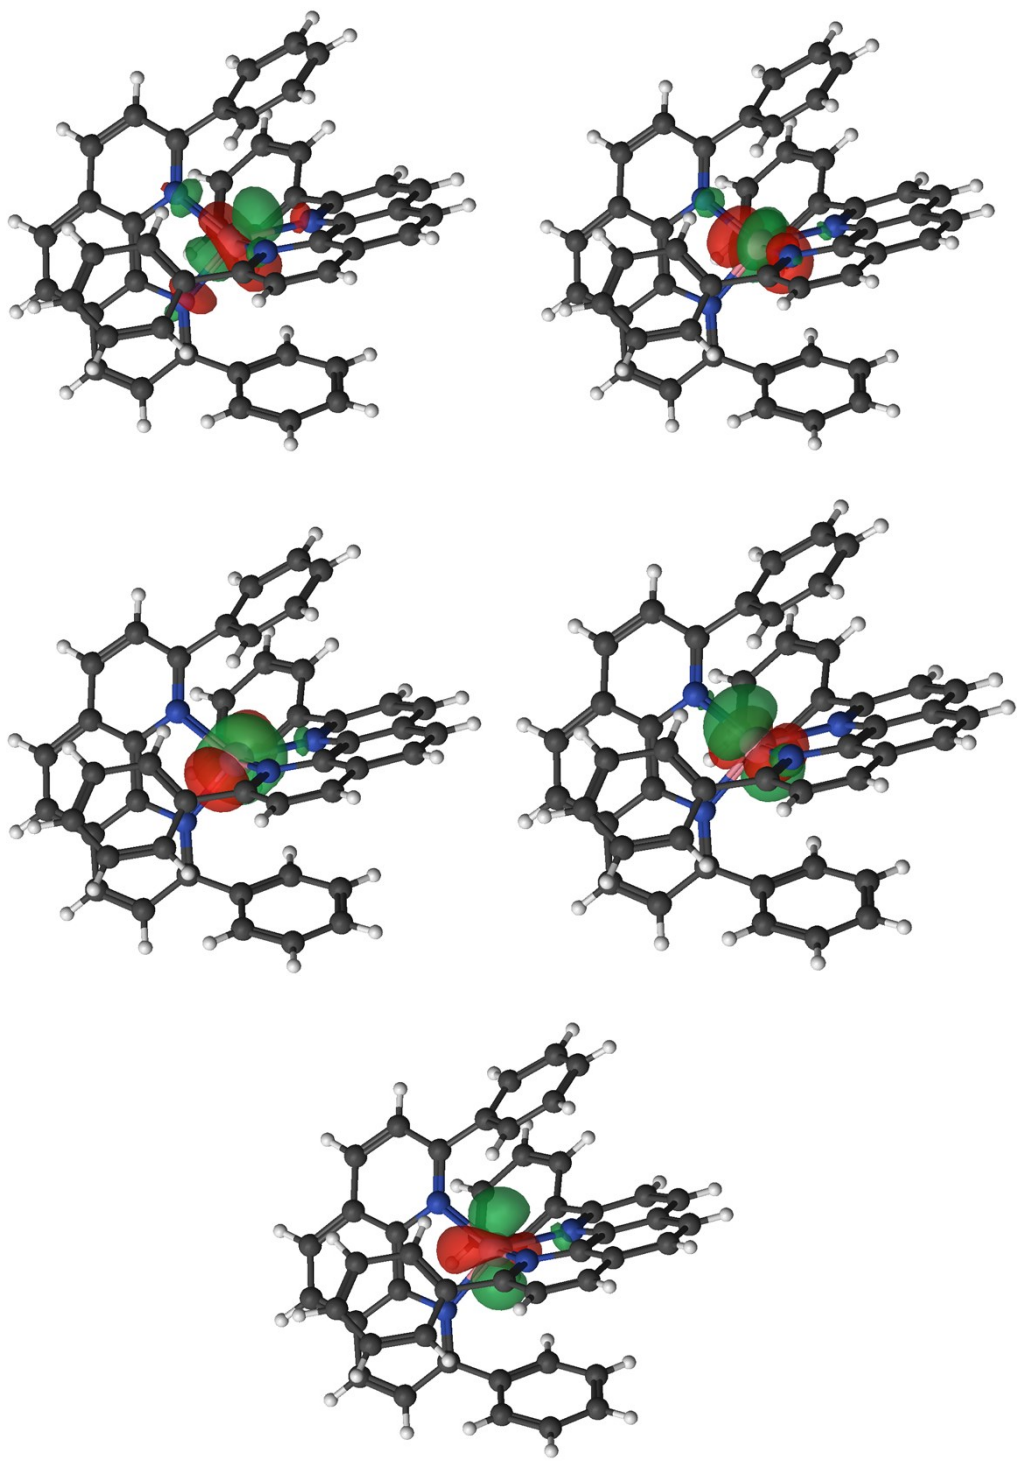

**Figure 2S** CASSCF(7 in 5) No.185 to No.189 Molecular Orbital draw in LUSCUS

| Co basic set (ANO-RCC)   | MB       | <b>VDZ</b>      | VDZP     | VTZP     | VQZP     | VQZP     |
|--------------------------|----------|-----------------|----------|----------|----------|----------|
| C H N basic set(ANO-RCC) | MB       | <b>VDZ</b>      | VDZ      | VDZ      | VDZ      | VDZP     |
| D                        | -39.7180 | <b>-45.8895</b> | -45.8232 | -44.8076 | -44.0497 | -43.0816 |
| E                        | 6.8603   | <b>7.1480</b>   | 7.1772   | 7.1747   | 7.0206   | 6.9386   |
| gx                       | 2.0972   | <b>2.1045</b>   | 2.1049   | 2.1065   | 2.1063   | 2.1058   |
| gy                       | 2.2909   | <b>2.3005</b>   | 2.3010   | 2.3020   | 2.2997   | 2.2964   |
| gz                       | 2.6839   | <b>2.7393</b>   | 2.7401   | 2.7304   | 2.7272   | 2.7145   |

**Table 2S**, the result of using Molcas8.2 *ab initio* in **SEWARD** / **CASSCF** / **RASSI** / **SINGLE\_ANISO** ,Complete-active-space self-consistent field(CASSCF 7 in 5) consider 10 triplet and 40 doublet states.

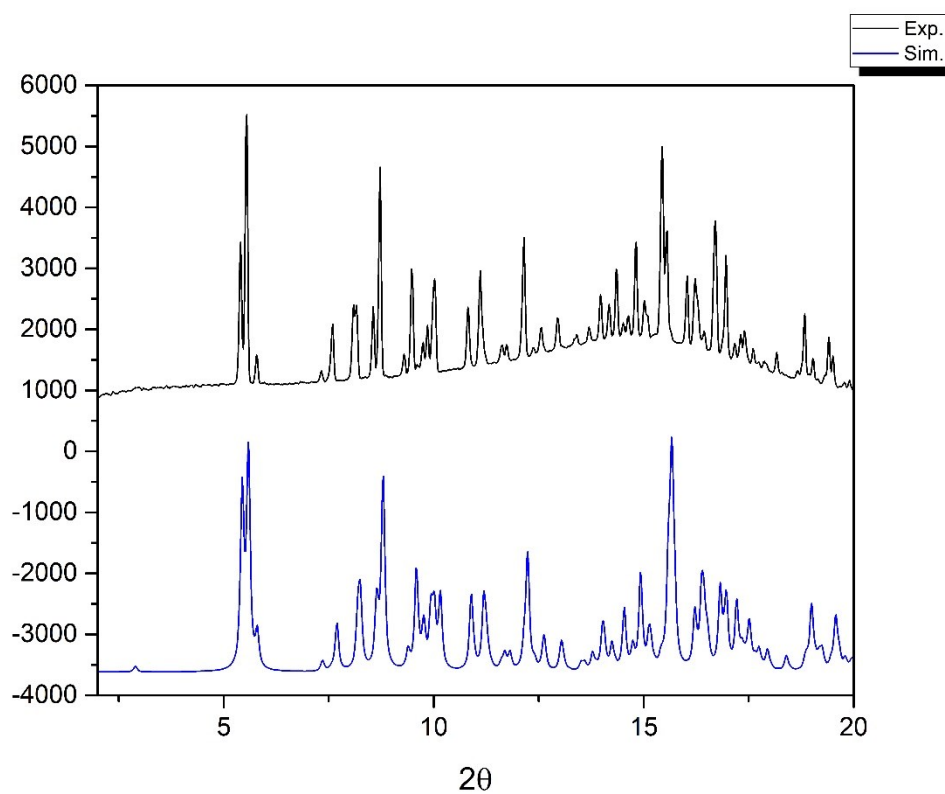

**Figure 3S**. Powder X-ray measurements of Compound 1 (top) and its theoretical simulations (bottom).

Table 3S. Crystal data and structure refinement for ic16900.

|                                   |                                                                                  |                   |
|-----------------------------------|----------------------------------------------------------------------------------|-------------------|
| Identification code               | ic16900                                                                          |                   |
| Empirical formula                 | C <sub>48</sub> H <sub>32</sub> Cl <sub>2</sub> Co N <sub>4</sub> O <sub>8</sub> |                   |
| Formula weight                    | 922.61                                                                           |                   |
| Temperature                       | 200(2) K                                                                         |                   |
| Wavelength                        | 0.71073 Å                                                                        |                   |
| Crystal system                    | Triclinic                                                                        |                   |
| Space group                       | P-1                                                                              |                   |
| Unit cell dimensions              | a = 7.8409(4) Å                                                                  | α = 88.1321(11)°. |
|                                   | b = 12.8630(6) Å                                                                 | β = 89.0043(11)°. |
|                                   | c = 20.4373(10) Å                                                                | γ = 79.0659(10)°. |
| Volume                            | 2022.63(17) Å <sup>3</sup>                                                       |                   |
| Z                                 | 2                                                                                |                   |
| Density (calculated)              | 1.515 Mg/m <sup>3</sup>                                                          |                   |
| Absorption coefficient            | 0.621 mm <sup>-1</sup>                                                           |                   |
| F(000)                            | 946                                                                              |                   |
| Crystal size                      | 0.35 x 0.30 x 0.15 mm <sup>3</sup>                                               |                   |
| Theta range for data collection   | 1.00 to 27.50°.                                                                  |                   |
| Index ranges                      | -10 ≤ h ≤ 10, -16 ≤ k ≤ 16, -26 ≤ l ≤ 26                                         |                   |
| Reflections collected             | 26412                                                                            |                   |
| Independent reflections           | 9268 [R(int) = 0.0311]                                                           |                   |
| Completeness to theta = 27.50°    | 99.8 %                                                                           |                   |
| Absorption correction             | Semi-empirical from equivalents                                                  |                   |
| Max. and min. transmission        | 0.9127 and 0.8121                                                                |                   |
| Refinement method                 | Full-matrix least-squares on F <sup>2</sup>                                      |                   |
| Data / restraints / parameters    | 9268 / 0 / 568                                                                   |                   |
| Goodness-of-fit on F <sup>2</sup> | 1.042                                                                            |                   |
| Final R indices [I > 2σ(I)]       | R1 = 0.0480, wR2 = 0.1153                                                        |                   |
| R indices (all data)              | R1 = 0.0595, wR2 = 0.1225                                                        |                   |
| Largest diff. peak and hole       | 0.717 and -0.381 e.Å <sup>-3</sup>                                               |                   |

Table 4S. Atomic coordinates ( $\times 10^4$ ) and equivalent isotropic displacement parameters ( $\text{\AA}^2 \times 10^3$ )

for ic16900.  $U(\text{eq})$  is defined as one third of the trace of the orthogonalized  $U^{ij}$  tensor.

|       | x        | y        | z       | $U(\text{eq})$ |
|-------|----------|----------|---------|----------------|
| Co    | 5876(1)  | 7450(1)  | 2546(1) | 27(1)          |
| N(1)  | 7124(2)  | 6502(1)  | 3265(1) | 27(1)          |
| N(2)  | 4097(2)  | 7933(1)  | 3255(1) | 28(1)          |
| N(3)  | 6386(2)  | 8691(2)  | 2001(1) | 31(1)          |
| N(4)  | 5844(2)  | 6776(1)  | 1670(1) | 28(1)          |
| C(1)  | 8559(3)  | 5750(2)  | 3242(1) | 30(1)          |
| C(2)  | 9099(3)  | 5106(2)  | 3800(1) | 37(1)          |
| C(3)  | 8182(3)  | 5254(2)  | 4372(1) | 39(1)          |
| C(4)  | 6675(3)  | 6038(2)  | 4408(1) | 34(1)          |
| C(5)  | 5647(4)  | 6249(2)  | 4990(1) | 42(1)          |
| C(6)  | 4217(3)  | 7016(2)  | 5001(1) | 41(1)          |
| C(7)  | 3674(3)  | 7633(2)  | 4422(1) | 34(1)          |
| C(8)  | 2239(3)  | 8477(2)  | 4404(1) | 38(1)          |
| C(9)  | 1792(3)  | 9023(2)  | 3833(1) | 35(1)          |
| C(10) | 2706(3)  | 8721(2)  | 3250(1) | 30(1)          |
| C(11) | 6177(3)  | 6633(2)  | 3835(1) | 29(1)          |
| C(12) | 4608(3)  | 7417(2)  | 3835(1) | 28(1)          |
| C(13) | 9513(3)  | 5586(2)  | 2616(1) | 31(1)          |
| C(14) | 10206(3) | 4560(2)  | 2422(1) | 39(1)          |
| C(15) | 10953(4) | 4394(2)  | 1813(1) | 47(1)          |
| C(16) | 11056(4) | 5239(2)  | 1388(1) | 48(1)          |
| C(17) | 10448(3) | 6262(2)  | 1580(1) | 40(1)          |
| C(18) | 9689(3)  | 6436(2)  | 2192(1) | 34(1)          |
| C(19) | 2144(3)  | 9255(2)  | 2620(1) | 32(1)          |
| C(20) | 2188(3)  | 8684(2)  | 2050(1) | 38(1)          |
| C(21) | 1675(4)  | 9192(2)  | 1460(1) | 50(1)          |
| C(22) | 1108(4)  | 10274(3) | 1434(2) | 57(1)          |
| C(23) | 1042(4)  | 10847(2) | 1994(2) | 54(1)          |
| C(24) | 1540(3)  | 10347(2) | 2588(1) | 42(1)          |
| C(25) | 6514(3)  | 9660(2)  | 2188(1) | 37(1)          |
| C(26) | 6609(4)  | 10472(2) | 1718(2) | 52(1)          |
| C(27) | 6672(4)  | 10260(2) | 1069(2) | 56(1)          |

|       |         |          |         |        |
|-------|---------|----------|---------|--------|
| C(28) | 6596(4) | 9239(2)  | 862(1)  | 45(1)  |
| C(29) | 6716(4) | 8932(3)  | 197(1)  | 56(1)  |
| C(30) | 6626(4) | 7937(3)  | 33(1)   | 54(1)  |
| C(31) | 6361(3) | 7159(2)  | 523(1)  | 41(1)  |
| C(32) | 6297(4) | 6105(2)  | 393(1)  | 47(1)  |
| C(33) | 6023(4) | 5417(2)  | 891(1)  | 41(1)  |
| C(34) | 5766(3) | 5776(2)  | 1535(1) | 32(1)  |
| C(35) | 6386(3) | 8488(2)  | 1352(1) | 34(1)  |
| C(36) | 6180(3) | 7450(2)  | 1177(1) | 32(1)  |
| C(37) | 6552(3) | 9812(2)  | 2900(1) | 36(1)  |
| C(38) | 5523(3) | 10689(2) | 3188(2) | 46(1)  |
| C(39) | 5473(4) | 10764(2) | 3860(2) | 53(1)  |
| C(40) | 6445(4) | 9988(2)  | 4253(1) | 48(1)  |
| C(41) | 7489(3) | 9127(2)  | 3975(1) | 42(1)  |
| C(42) | 7550(3) | 9049(2)  | 3302(1) | 36(1)  |
| C(43) | 5458(3) | 5062(2)  | 2085(1) | 32(1)  |
| C(44) | 4283(3) | 5416(2)  | 2585(1) | 35(1)  |
| C(45) | 4078(4) | 4760(2)  | 3114(1) | 42(1)  |
| C(46) | 5046(4) | 3747(2)  | 3157(1) | 48(1)  |
| C(47) | 6200(4) | 3381(2)  | 2663(1) | 48(1)  |
| C(48) | 6396(3) | 4029(2)  | 2122(1) | 39(1)  |
| CI(1) | 655(1)  | 2302(1)  | 4220(1) | 43(1)  |
| O(1)  | 1850(3) | 2683(2)  | 3786(1) | 79(1)  |
| O(2)  | 1344(4) | 1254(2)  | 4434(1) | 76(1)  |
| O(3)  | -923(3) | 2342(3)  | 3885(1) | 94(1)  |
| O(4)  | 297(3)  | 2956(2)  | 4773(1) | 64(1)  |
| CI(2) | 8358(1) | 2697(1)  | 352(1)  | 45(1)  |
| O(5)  | 6737(4) | 2730(2)  | 709(1)  | 84(1)  |
| O(6)  | 8052(5) | 3522(2)  | -103(2) | 128(1) |
| O(7)  | 9582(5) | 2799(3)  | 804(2)  | 131(2) |
| O(8)  | 8859(4) | 1705(2)  | 44(1)   | 74(1)  |

---

Table 5S. Bond lengths [ $\text{\AA}$ ] and angles [ $^\circ$ ] for  
ic16900.

---

|             |            |             |          |
|-------------|------------|-------------|----------|
| Co-N(3)     | 2.0152(19) | C(21)-C(22) | 1.378(4) |
| Co-N(4)     | 2.0177(18) | C(22)-C(23) | 1.377(4) |
| Co-N(1)     | 2.0206(18) | C(23)-C(24) | 1.381(4) |
| Co-N(2)     | 2.0228(18) | C(25)-C(26) | 1.407(4) |
| N(1)-C(1)   | 1.339(3)   | C(25)-C(37) | 1.475(4) |
| N(1)-C(11)  | 1.368(3)   | C(26)-C(27) | 1.361(4) |
| N(2)-C(10)  | 1.341(3)   | C(27)-C(28) | 1.405(4) |
| N(2)-C(12)  | 1.367(3)   | C(28)-C(35) | 1.397(3) |
| N(3)-C(25)  | 1.338(3)   | C(28)-C(29) | 1.425(4) |
| N(3)-C(35)  | 1.361(3)   | C(29)-C(30) | 1.349(4) |
| N(4)-C(34)  | 1.337(3)   | C(30)-C(31) | 1.433(4) |
| N(4)-C(36)  | 1.362(3)   | C(31)-C(36) | 1.398(3) |
| C(1)-C(2)   | 1.410(3)   | C(31)-C(32) | 1.399(4) |
| C(1)-C(13)  | 1.473(3)   | C(32)-C(33) | 1.369(4) |
| C(2)-C(3)   | 1.361(3)   | C(33)-C(34) | 1.406(3) |
| C(3)-C(4)   | 1.403(3)   | C(34)-C(43) | 1.475(3) |
| C(4)-C(11)  | 1.397(3)   | C(35)-C(36) | 1.433(3) |
| C(4)-C(5)   | 1.430(3)   | C(37)-C(42) | 1.389(3) |
| C(5)-C(6)   | 1.346(4)   | C(37)-C(38) | 1.397(4) |
| C(6)-C(7)   | 1.429(3)   | C(38)-C(39) | 1.380(4) |
| C(7)-C(12)  | 1.402(3)   | C(39)-C(40) | 1.379(4) |
| C(7)-C(8)   | 1.407(3)   | C(40)-C(41) | 1.379(4) |
| C(8)-C(9)   | 1.360(3)   | C(41)-C(42) | 1.382(4) |
| C(9)-C(10)  | 1.406(3)   | C(43)-C(48) | 1.392(3) |
| C(10)-C(19) | 1.474(3)   | C(43)-C(44) | 1.393(3) |
| C(11)-C(12) | 1.435(3)   | C(44)-C(45) | 1.376(3) |
| C(13)-C(14) | 1.397(3)   | C(45)-C(46) | 1.379(4) |
| C(13)-C(18) | 1.398(3)   | C(46)-C(47) | 1.377(4) |
| C(14)-C(15) | 1.372(4)   | C(47)-C(48) | 1.388(4) |
| C(15)-C(16) | 1.383(4)   | Cl(1)-O(2)  | 1.412(2) |
| C(16)-C(17) | 1.380(4)   | Cl(1)-O(3)  | 1.415(3) |
| C(17)-C(18) | 1.381(3)   | Cl(1)-O(1)  | 1.421(2) |
| C(19)-C(20) | 1.394(3)   | Cl(1)-O(4)  | 1.424(2) |
| C(19)-C(24) | 1.395(3)   | Cl(2)-O(7)  | 1.370(3) |
| C(20)-C(21) | 1.382(4)   | Cl(2)-O(6)  | 1.377(3) |



|                  |            |                   |            |
|------------------|------------|-------------------|------------|
| Cl(2)-O(8)       | 1.426(2)   | N(1)-C(11)-C(4)   | 122.8(2)   |
| Cl(2)-O(5)       | 1.448(3)   | N(1)-C(11)-C(12)  | 117.78(19) |
| N(3)-Co-N(4)     | 83.60(8)   | C(4)-C(11)-C(12)  | 119.5(2)   |
| N(3)-Co-N(1)     | 134.94(8)  | N(2)-C(12)-C(7)   | 122.7(2)   |
| N(4)-Co-N(1)     | 115.52(7)  | N(2)-C(12)-C(11)  | 117.84(19) |
| N(3)-Co-N(2)     | 111.07(8)  | C(7)-C(12)-C(11)  | 119.5(2)   |
| N(4)-Co-N(2)     | 135.41(7)  | C(14)-C(13)-C(18) | 118.5(2)   |
| N(1)-Co-N(2)     | 84.29(7)   | C(14)-C(13)-C(1)  | 119.8(2)   |
| C(1)-N(1)-C(11)  | 119.20(19) | C(18)-C(13)-C(1)  | 121.6(2)   |
| C(1)-N(1)-Co     | 130.47(15) | C(15)-C(14)-C(13) | 120.2(2)   |
| C(11)-N(1)-Co    | 110.00(14) | C(14)-C(15)-C(16) | 120.6(2)   |
| C(10)-N(2)-C(12) | 119.06(19) | C(17)-C(16)-C(15) | 120.1(2)   |
| C(10)-N(2)-Co    | 130.46(15) | C(16)-C(17)-C(18) | 119.6(2)   |
| C(12)-N(2)-Co    | 109.95(14) | C(17)-C(18)-C(13) | 120.8(2)   |
| C(25)-N(3)-C(35) | 119.5(2)   | C(20)-C(19)-C(24) | 118.9(2)   |
| C(25)-N(3)-Co    | 129.22(17) | C(20)-C(19)-C(10) | 121.0(2)   |
| C(35)-N(3)-Co    | 110.78(15) | C(24)-C(19)-C(10) | 120.0(2)   |
| C(34)-N(4)-C(36) | 119.35(19) | C(21)-C(20)-C(19) | 120.7(2)   |
| C(34)-N(4)-Co    | 129.41(15) | C(22)-C(21)-C(20) | 119.8(3)   |
| C(36)-N(4)-Co    | 110.62(15) | C(23)-C(22)-C(21) | 120.1(3)   |
| N(1)-C(1)-C(2)   | 120.5(2)   | C(22)-C(23)-C(24) | 120.7(3)   |
| N(1)-C(1)-C(13)  | 118.41(19) | C(23)-C(24)-C(19) | 119.8(3)   |
| C(2)-C(1)-C(13)  | 121.0(2)   | N(3)-C(25)-C(26)  | 120.4(2)   |
| C(3)-C(2)-C(1)   | 120.3(2)   | N(3)-C(25)-C(37)  | 116.4(2)   |
| C(2)-C(3)-C(4)   | 120.2(2)   | C(26)-C(25)-C(37) | 123.3(2)   |
| C(11)-C(4)-C(3)  | 117.0(2)   | C(27)-C(26)-C(25) | 120.1(3)   |
| C(11)-C(4)-C(5)  | 119.3(2)   | C(26)-C(27)-C(28) | 120.4(2)   |
| C(3)-C(4)-C(5)   | 123.7(2)   | C(35)-C(28)-C(27) | 116.6(2)   |
| C(6)-C(5)-C(4)   | 121.5(2)   | C(35)-C(28)-C(29) | 118.9(3)   |
| C(5)-C(6)-C(7)   | 120.3(2)   | C(27)-C(28)-C(29) | 124.5(2)   |
| C(12)-C(7)-C(8)  | 116.9(2)   | C(30)-C(29)-C(28) | 121.3(2)   |
| C(12)-C(7)-C(6)  | 119.7(2)   | C(29)-C(30)-C(31) | 121.0(3)   |
| C(8)-C(7)-C(6)   | 123.4(2)   | C(36)-C(31)-C(32) | 116.9(2)   |
| C(9)-C(8)-C(7)   | 120.0(2)   | C(36)-C(31)-C(30) | 118.8(3)   |
| C(8)-C(9)-C(10)  | 120.4(2)   | C(32)-C(31)-C(30) | 124.3(2)   |
| N(2)-C(10)-C(9)  | 120.7(2)   | C(33)-C(32)-C(31) | 120.3(2)   |
| N(2)-C(10)-C(19) | 118.6(2)   | C(32)-C(33)-C(34) | 119.8(2)   |
| C(9)-C(10)-C(19) | 120.7(2)   | N(4)-C(34)-C(33)  | 120.7(2)   |

|                   |            |                   |
|-------------------|------------|-------------------|
| N(4)-C(34)-C(43)  | 117.68(19) | equivalent atoms: |
| C(33)-C(34)-C(43) | 121.6(2)   |                   |
| N(3)-C(35)-C(28)  | 122.8(2)   |                   |
| N(3)-C(35)-C(36)  | 117.3(2)   |                   |
| C(28)-C(35)-C(36) | 119.9(2)   |                   |
| N(4)-C(36)-C(31)  | 122.8(2)   |                   |
| N(4)-C(36)-C(35)  | 117.5(2)   |                   |
| C(31)-C(36)-C(35) | 119.8(2)   |                   |
| C(42)-C(37)-C(38) | 118.6(2)   |                   |
| C(42)-C(37)-C(25) | 120.1(2)   |                   |
| C(38)-C(37)-C(25) | 121.2(2)   |                   |
| C(39)-C(38)-C(37) | 119.9(3)   |                   |
| C(40)-C(39)-C(38) | 120.8(3)   |                   |
| C(41)-C(40)-C(39) | 120.0(3)   |                   |
| C(40)-C(41)-C(42) | 119.5(3)   |                   |
| C(41)-C(42)-C(37) | 121.2(2)   |                   |
| C(48)-C(43)-C(44) | 119.1(2)   |                   |
| C(48)-C(43)-C(34) | 119.9(2)   |                   |
| C(44)-C(43)-C(34) | 121.0(2)   |                   |
| C(45)-C(44)-C(43) | 120.4(2)   |                   |
| C(44)-C(45)-C(46) | 120.3(3)   |                   |
| C(47)-C(46)-C(45) | 120.0(2)   |                   |
| C(46)-C(47)-C(48) | 120.2(3)   |                   |
| C(47)-C(48)-C(43) | 119.9(2)   |                   |
| O(2)-Cl(1)-O(3)   | 110.48(19) |                   |
| O(2)-Cl(1)-O(1)   | 110.04(14) |                   |
| O(3)-Cl(1)-O(1)   | 108.50(17) |                   |
| O(2)-Cl(1)-O(4)   | 109.25(14) |                   |
| O(3)-Cl(1)-O(4)   | 107.94(15) |                   |
| O(1)-Cl(1)-O(4)   | 110.62(16) |                   |
| O(7)-Cl(2)-O(6)   | 113.6(3)   |                   |
| O(7)-Cl(2)-O(8)   | 109.09(18) |                   |
| O(6)-Cl(2)-O(8)   | 111.24(18) |                   |
| O(7)-Cl(2)-O(5)   | 106.7(2)   |                   |
| O(6)-Cl(2)-O(5)   | 105.9(2)   |                   |
| O(8)-Cl(2)-O(5)   | 110.20(15) |                   |

---

Symmetry transformations used to generate

Table 6S. Anisotropic displacement parameters ( $\text{\AA}^2 \times 10^3$ ) for ic16900. The anisotropic displacement factor exponent takes the form:  $-2\pi^2 [h^2 a^{*2} U^{11} + \dots + 2 h k a^* b^* U^{12}]$

|       | U <sup>11</sup> | U <sup>22</sup> | U <sup>33</sup> | U <sup>23</sup> | U <sup>13</sup> | U <sup>12</sup> |
|-------|-----------------|-----------------|-----------------|-----------------|-----------------|-----------------|
| Co    | 31(1)           | 27(1)           | 23(1)           | 1(1)            | 1(1)            | -4(1)           |
| N(1)  | 27(1)           | 29(1)           | 26(1)           | 0(1)            | -1(1)           | -6(1)           |
| N(2)  | 27(1)           | 30(1)           | 25(1)           | -1(1)           | 0(1)            | -6(1)           |
| N(3)  | 30(1)           | 30(1)           | 32(1)           | 3(1)            | -2(1)           | -6(1)           |
| N(4)  | 30(1)           | 31(1)           | 25(1)           | 0(1)            | 0(1)            | -6(1)           |
| C(1)  | 29(1)           | 30(1)           | 33(1)           | -1(1)           | -2(1)           | -6(1)           |
| C(2)  | 34(1)           | 35(1)           | 39(1)           | 5(1)            | -4(1)           | -2(1)           |
| C(3)  | 42(1)           | 42(1)           | 31(1)           | 7(1)            | -6(1)           | -5(1)           |
| C(4)  | 38(1)           | 38(1)           | 27(1)           | 2(1)            | -3(1)           | -11(1)          |
| C(5)  | 49(2)           | 52(2)           | 23(1)           | 5(1)            | -1(1)           | -10(1)          |
| C(6)  | 44(1)           | 55(2)           | 24(1)           | -2(1)           | 5(1)            | -13(1)          |
| C(7)  | 34(1)           | 43(1)           | 27(1)           | -4(1)           | 3(1)            | -12(1)          |
| C(8)  | 35(1)           | 47(1)           | 33(1)           | -11(1)          | 9(1)            | -10(1)          |
| C(9)  | 29(1)           | 37(1)           | 38(1)           | -7(1)           | 3(1)            | -5(1)           |
| C(10) | 27(1)           | 30(1)           | 34(1)           | -5(1)           | 0(1)            | -8(1)           |
| C(11) | 29(1)           | 33(1)           | 25(1)           | -1(1)           | -1(1)           | -9(1)           |
| C(12) | 28(1)           | 32(1)           | 27(1)           | -3(1)           | 1(1)            | -9(1)           |
| C(13) | 26(1)           | 34(1)           | 33(1)           | -3(1)           | -1(1)           | -4(1)           |
| C(14) | 39(1)           | 34(1)           | 44(1)           | -4(1)           | 1(1)            | -8(1)           |
| C(15) | 50(2)           | 40(1)           | 51(2)           | -14(1)          | 7(1)            | -7(1)           |
| C(16) | 49(2)           | 59(2)           | 38(1)           | -12(1)          | 10(1)           | -10(1)          |
| C(17) | 40(1)           | 46(2)           | 36(1)           | 3(1)            | 4(1)            | -8(1)           |
| C(18) | 30(1)           | 33(1)           | 36(1)           | 0(1)            | 3(1)            | -2(1)           |
| C(19) | 25(1)           | 36(1)           | 36(1)           | 0(1)            | -2(1)           | -4(1)           |
| C(20) | 36(1)           | 39(1)           | 38(1)           | -3(1)           | -4(1)           | -1(1)           |
| C(21) | 46(2)           | 64(2)           | 38(1)           | -1(1)           | -6(1)           | -2(1)           |
| C(22) | 52(2)           | 66(2)           | 47(2)           | 16(2)           | -6(1)           | -2(2)           |
| C(23) | 52(2)           | 41(2)           | 65(2)           | 13(1)           | -4(1)           | 1(1)            |
| C(24) | 40(1)           | 37(1)           | 48(2)           | -1(1)           | -1(1)           | -1(1)           |
| C(25) | 34(1)           | 30(1)           | 47(1)           | 3(1)            | -5(1)           | -8(1)           |
| C(26) | 59(2)           | 35(1)           | 63(2)           | 9(1)            | -12(1)          | -16(1)          |
| C(27) | 70(2)           | 45(2)           | 57(2)           | 24(1)           | -13(2)          | -25(2)          |
| C(28) | 47(2)           | 49(2)           | 40(1)           | 15(1)           | -6(1)           | -14(1)          |

|       |        |        |        |        |        |        |
|-------|--------|--------|--------|--------|--------|--------|
| C(29) | 66(2)  | 67(2)  | 37(2)  | 21(1)  | -2(1)  | -22(2) |
| C(30) | 62(2)  | 71(2)  | 29(1)  | 9(1)   | 2(1)   | -16(2) |
| C(31) | 44(1)  | 51(2)  | 26(1)  | 3(1)   | 1(1)   | -6(1)  |
| C(32) | 56(2)  | 57(2)  | 26(1)  | -9(1)  | 1(1)   | -7(1)  |
| C(33) | 49(2)  | 42(1)  | 33(1)  | -9(1)  | -2(1)  | -7(1)  |
| C(34) | 32(1)  | 34(1)  | 30(1)  | -3(1)  | -2(1)  | -6(1)  |
| C(35) | 34(1)  | 36(1)  | 31(1)  | 7(1)   | -1(1)  | -8(1)  |
| C(36) | 32(1)  | 39(1)  | 26(1)  | 4(1)   | -1(1)  | -4(1)  |
| C(37) | 32(1)  | 30(1)  | 49(1)  | -4(1)  | -3(1)  | -11(1) |
| C(38) | 36(1)  | 30(1)  | 72(2)  | -7(1)  | -3(1)  | -7(1)  |
| C(39) | 40(2)  | 46(2)  | 74(2)  | -23(2) | 11(1)  | -8(1)  |
| C(40) | 45(2)  | 56(2)  | 48(2)  | -16(1) | 10(1)  | -18(1) |
| C(41) | 37(1)  | 46(2)  | 46(2)  | -5(1)  | 0(1)   | -15(1) |
| C(42) | 32(1)  | 34(1)  | 44(1)  | -8(1)  | -2(1)  | -7(1)  |
| C(43) | 35(1)  | 32(1)  | 30(1)  | -2(1)  | -4(1)  | -12(1) |
| C(44) | 34(1)  | 37(1)  | 36(1)  | -1(1)  | -3(1)  | -11(1) |
| C(45) | 44(1)  | 51(2)  | 36(1)  | -1(1)  | 4(1)   | -20(1) |
| C(46) | 62(2)  | 46(2)  | 39(1)  | 9(1)   | -6(1)  | -24(1) |
| C(47) | 64(2)  | 30(1)  | 51(2)  | 4(1)   | -11(1) | -14(1) |
| C(48) | 46(1)  | 32(1)  | 40(1)  | -6(1)  | -3(1)  | -10(1) |
| Cl(1) | 41(1)  | 40(1)  | 46(1)  | 1(1)   | 8(1)   | -3(1)  |
| O(1)  | 60(1)  | 73(2)  | 93(2)  | 37(1)  | 31(1)  | 4(1)   |
| O(2)  | 114(2) | 36(1)  | 69(2)  | 5(1)   | 31(1)  | 4(1)   |
| O(3)  | 56(2)  | 161(3) | 69(2)  | -28(2) | -6(1)  | -24(2) |
| O(4)  | 81(2)  | 42(1)  | 65(1)  | -11(1) | -1(1)  | 0(1)   |
| Cl(2) | 66(1)  | 33(1)  | 35(1)  | 0(1)   | 0(1)   | -6(1)  |
| O(5)  | 109(2) | 63(2)  | 87(2)  | -22(1) | 44(2)  | -32(2) |
| O(6)  | 190(4) | 81(2)  | 89(2)  | 46(2)  | 50(2)  | 19(2)  |
| O(7)  | 118(3) | 125(3) | 143(3) | -76(2) | -62(2) | 14(2)  |
| O(8)  | 102(2) | 58(1)  | 61(1)  | -28(1) | 3(1)   | -6(1)  |

---

Table 7S. Hydrogen coordinates ( $\times 10^4$ ) and isotropic displacement parameters ( $\text{\AA}^2 \times 10^{-3}$ ) for ic16900.

|       | x     | y     | z    | U(eq) |
|-------|-------|-------|------|-------|
| H(2)  | 10107 | 4565  | 3777 | 44    |
| H(3)  | 8564  | 4825  | 4748 | 47    |
| H(5)  | 5982  | 5840  | 5378 | 50    |
| H(6)  | 3565  | 7146  | 5396 | 49    |
| H(8)  | 1583  | 8664  | 4792 | 45    |
| H(9)  | 856   | 9613  | 3827 | 42    |
| H(14) | 10160 | 3974  | 2713 | 46    |
| H(15) | 11404 | 3692  | 1683 | 56    |
| H(16) | 11546 | 5114  | 963  | 58    |
| H(17) | 10552 | 6844  | 1294 | 49    |
| H(18) | 9281  | 7140  | 2326 | 41    |
| H(20) | 2576  | 7937  | 2067 | 46    |
| H(21) | 1712  | 8797  | 1073 | 60    |
| H(22) | 761   | 10626 | 1028 | 68    |
| H(23) | 650   | 11592 | 1973 | 65    |
| H(24) | 1470  | 10747 | 2974 | 51    |
| H(26) | 6630  | 11168 | 1854 | 62    |
| H(27) | 6769  | 10806 | 754  | 67    |
| H(29) | 6862  | 9439  | -138 | 67    |
| H(30) | 6740  | 7749  | -413 | 64    |
| H(32) | 6445  | 5867  | -43  | 56    |
| H(33) | 6007  | 4698  | 803  | 50    |
| H(38) | 4859  | 11232 | 2922 | 55    |
| H(39) | 4762  | 11358 | 4055 | 64    |
| H(40) | 6394  | 10046 | 4716 | 58    |
| H(41) | 8162  | 8592  | 4244 | 50    |
| H(42) | 8288  | 8463  | 3110 | 44    |
| H(44) | 3619  | 6115  | 2561 | 42    |
| H(45) | 3265  | 5005  | 3451 | 51    |
| H(46) | 4917  | 3302  | 3527 | 57    |
| H(47) | 6865  | 2682  | 2694 | 57    |
| H(48) | 7170  | 3767  | 1776 | 47    |

---
